# Supplementary material for: A morphology controllable synthesis of 3D graphene nanostructures and their energy storage applications
Source: Royal Society of Chemistry journal article supplement (doi:10.1039/c6ra07978d), 2016-01-01
Supplement: c6ra07978d1.pdf [file c6ra07978d1.pdf]

## Electronic Supplementary Information

---

# A morphology controllable synthesis of 3D graphene nanostructures and their energy storage applications

Jie Zhao,<sup>a, c</sup> Wei-Hua Li,<sup>\*, a</sup> Hui-Zhong Xu,<sup>b</sup> Li-Shui Sun,<sup>b</sup> Chao-Qin Li,<sup>b</sup> and Fa-

Qian Liu<sup>\*, b</sup>

<sup>a</sup>Institute of Oceanology, Chinese Academy of Science, Qingdao 266071, China.

<sup>b</sup> Engineering Research Center of High Performance Polymer and Molding  
Technology, Qingdao University of Science and Technology, Qingdao 266042,  
China.

<sup>c</sup> University of Chinese Academy of Science, Beijing, 100049, China.

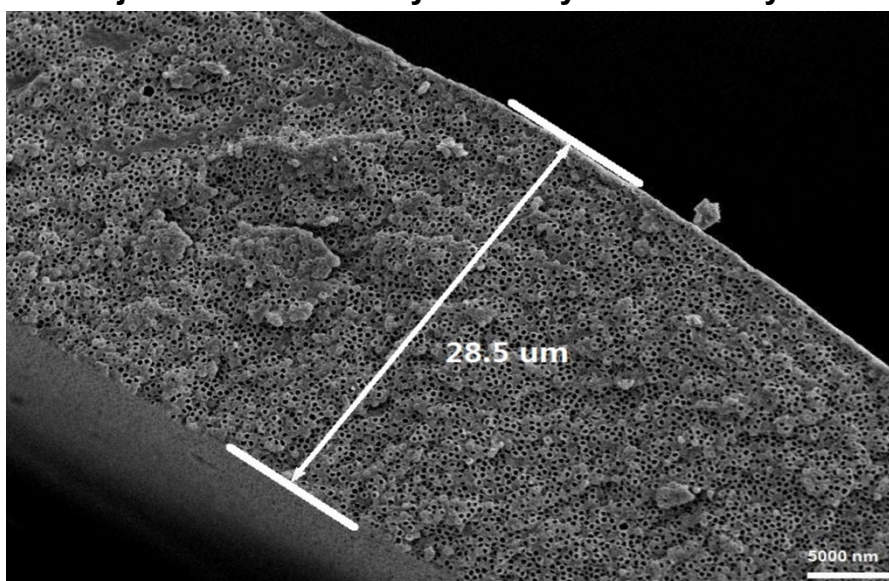

**Fig. S1 Low-magnified SEM image of the hollow nanobeads SG film.**

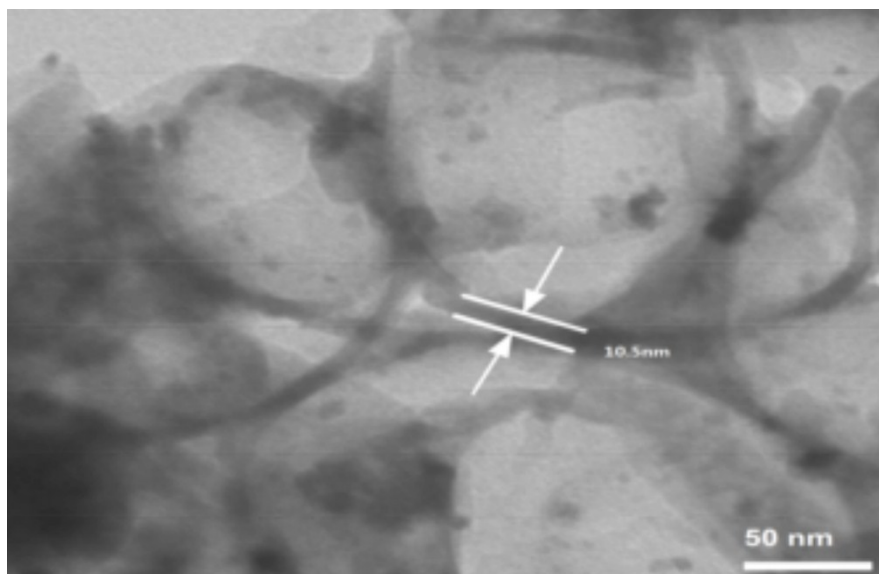

**Fig. S2** High-magnified TEM image of the hollow nanobeads SG.

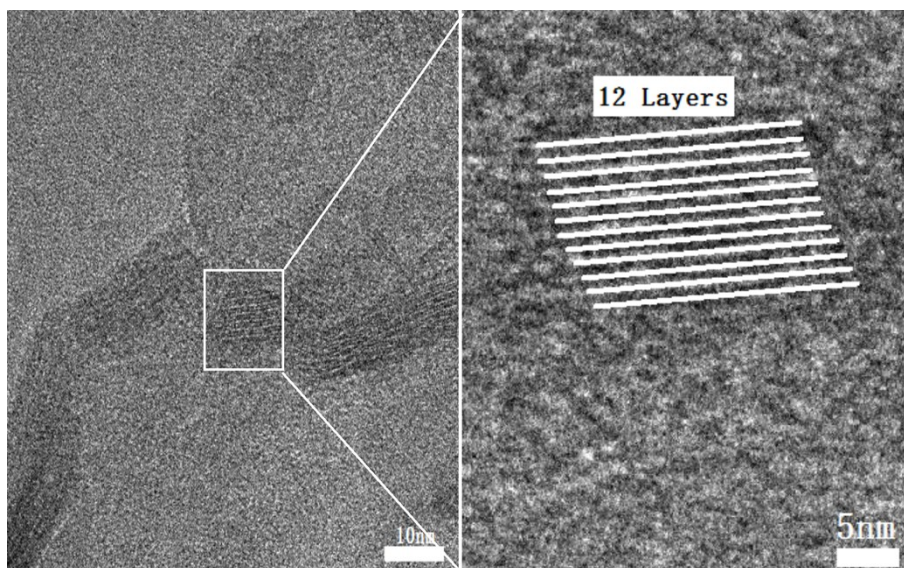

**Fig. S3** The High resolution transmission electron microscopy(HRTEM)  
images of the SG film of the hollow nanobeads.

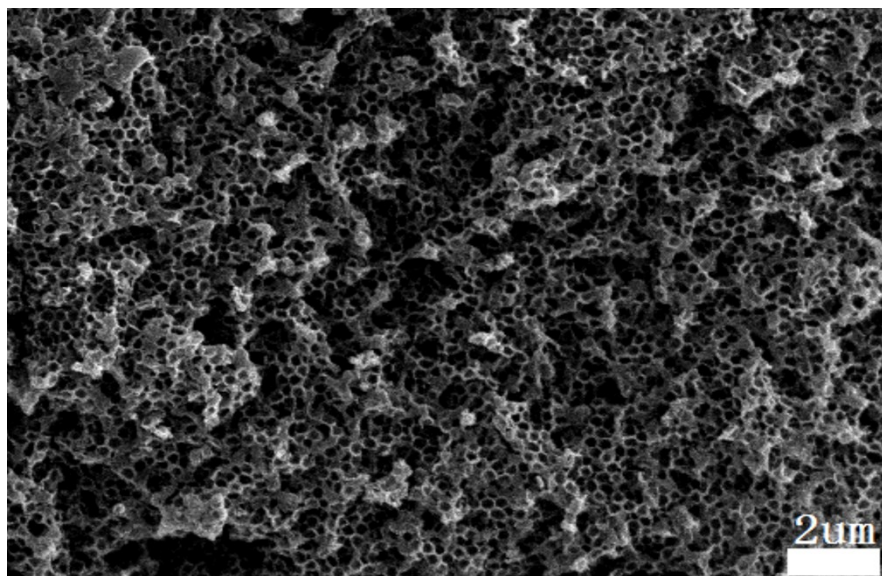

**Fig.S4** SEM image of the macro-porous SG prepared by controlling the  
PH under 2.

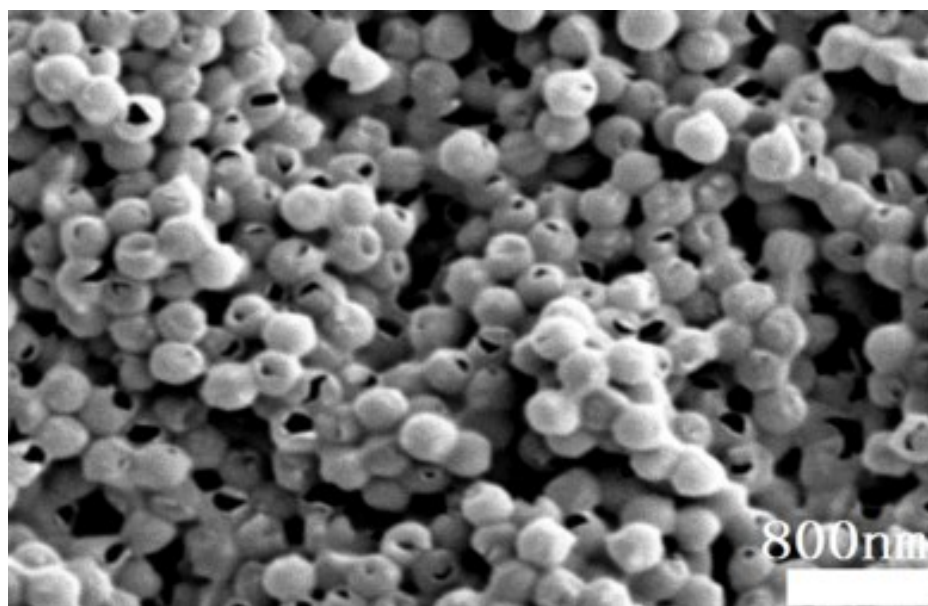

**Fig.S5** SEM image of the hollow nanobeads SG prepared by elevating the pH to 6.

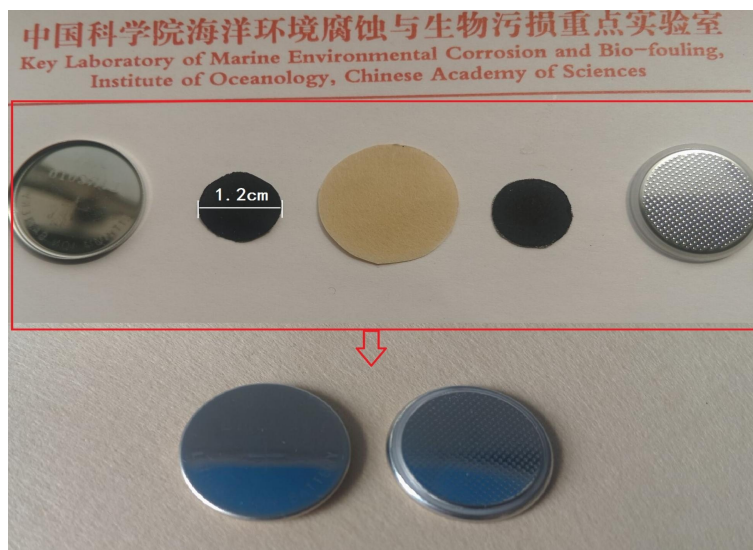

**Fig. S6** The photograph of the major parts of the supercapacitor.

**Table S1.** Impedance parameters of macro-porous SG electrode  
and hollow nanobeads electrode.

| Sample          | $R_{ct}(\Omega)$ | $R_{\Omega}(\Omega)$ |
|-----------------|------------------|----------------------|
| Macro-porous SG | 63.4             | 5.78                 |
| Nanobeads SG    | 85.79            | 5.86                 |
